# Supplementary material for: A novel gelatin-guided mesoporous bowknot-like Co3O4 anode material for high-performance lithium-ion batteries
Source: Royal Society of Chemistry journal article supplement (doi:10.1039/c6ta10327h), 2017-01-01
Supplement: c6ta10327h1.pdf [file c6ta10327h1.pdf]

## Supporting Information

### **A novel gelatin-guided mesoporous bowknot-like $\text{Co}_3\text{O}_4$ anode material for high-performance lithium-ion batteries**

Haoran Du, Chao Yuan, Kuangfu Huang, Wenhai Wang, Kai Zhang and Baoyou Geng\*

*College of Chemistry and Materials Science, Anhui Key Laboratory of Functional Molecular Solids, Ministry of Education, Anhui Laboratory of Molecular-Based Materials, Center for Nano-Science and Technology, Anhui Normal University, Wuhu, 241000, P. R. China.*

#### 1. Additional figures

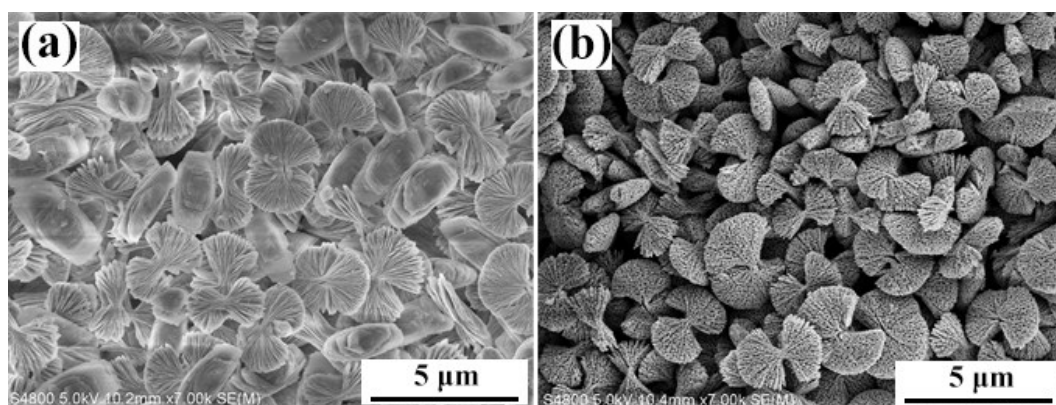

**Fig. S1** SEM images of (a) precursor (b)  $\text{Co}_3\text{O}_4$  at low magnification.

---

\* Corresponding author. Tel.: (+86)-0553-5910177. Fax: (+86)-0553-5910118.  
E-mail: bygeng@mail.ahnu.edu.cn

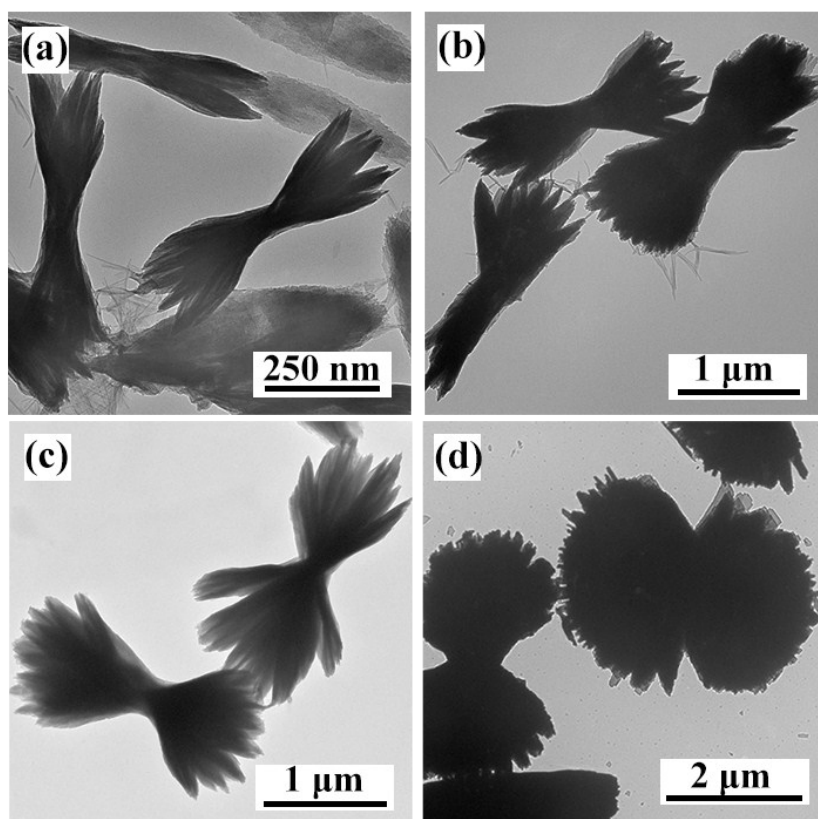

**Fig. S2** TEM images of precursor in different hydrothermal reaction time. (a) 5 h, (b) 10 h, (c) 15 h, and (d) 21h.

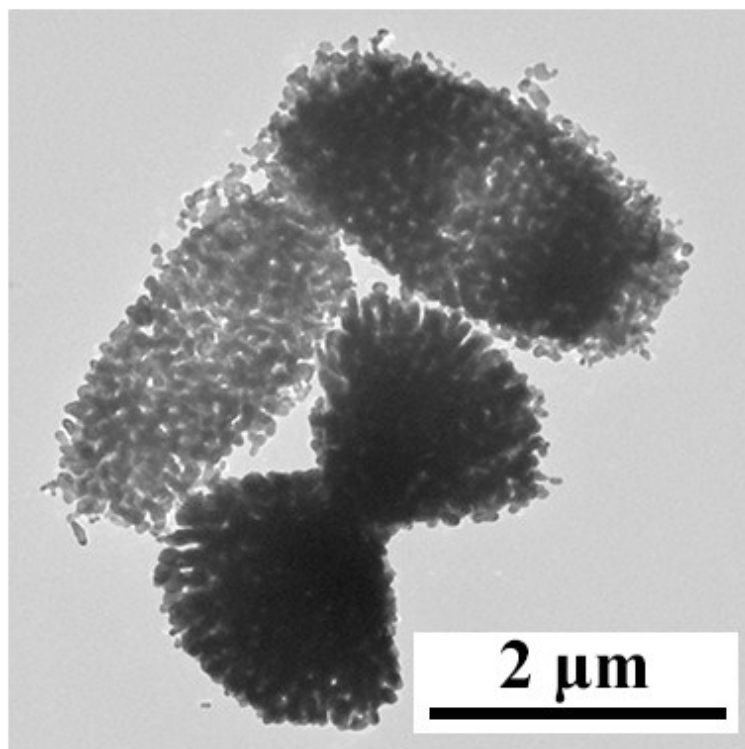

**Fig. S3** TEM image of  $\text{Co}_3\text{O}_4$  at low magnification.

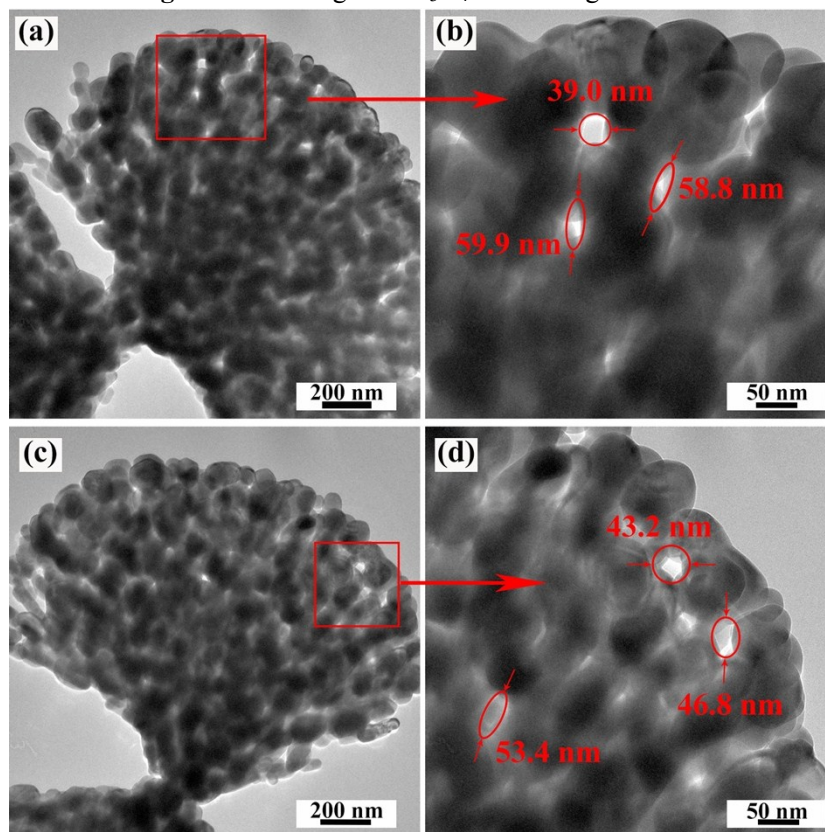

**Fig. S4** TEM images of  $\text{Co}_3\text{O}_4$  at different magnification.

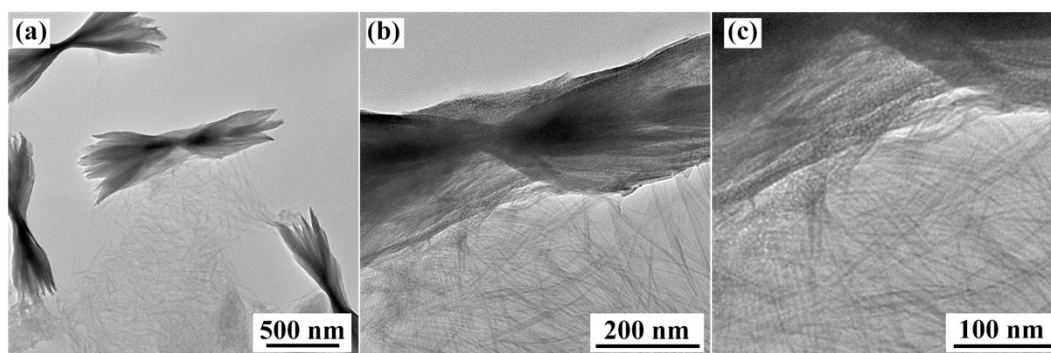

**Fig. S5** TEM image of fibers coating on precursor after 5 h hydrothermal reaction at different magnification.

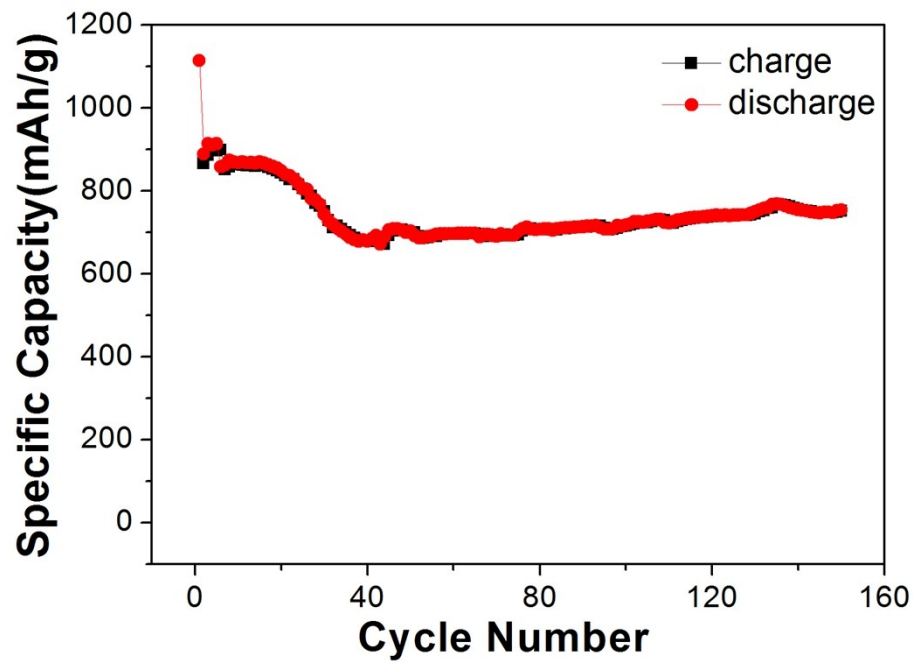

Fig. S6 The cycling performance of bowknot-like  $\text{Co}_3\text{O}_4$  at 2 C.

## 2. Additional table

**Table S1** Comparison of electrochemical performance of Co<sub>3</sub>O<sub>4</sub> as anode material for the LIBs

| Materials                                               | First discharge capacity  | Initial coulombic efficiency | Cycle performance                  | Rate performance                  | Ref.      |
|---------------------------------------------------------|---------------------------|------------------------------|------------------------------------|-----------------------------------|-----------|
| Star-like Co <sub>3</sub> O <sub>4</sub>                | 1324 mAh/g<br>(0.05 A/g)  | 78%                          | 1200 mAh/g<br>(0.05 A/g, 100th)    | 976 mAh/g<br>(2 A/g, 10th)        | 6         |
| Snowflake-shaped Co <sub>3</sub> O <sub>4</sub>         | 1240 mAh/g<br>(0.5 A/g)   | 77%                          | 1044 mAh/g<br>(0.5 A/g, 100th)     | 1117 mAh/g<br>(2 A/g, 10th)       | 21        |
| Porous Co <sub>3</sub> O <sub>4</sub> nanocage          | 1557 mAh/g<br>(0.3 A/g)   | ~                            | 1465 mAh/g<br>(0.3 A/g, 50th)      | ~940 mAh/g<br>(3 A/g, 5th)        | 22        |
| Co <sub>3</sub> O <sub>4</sub> hexagonal nanoring       | 1324 mAh/g<br>(0.1 A/g)   | 78%                          | 1370 mAh/g<br>(0.1 A/g, 30th)      | ~1300 mAh/g<br>(1 A/g, 5th)       | 23        |
| Porous Co <sub>3</sub> O <sub>4</sub> nanosheets        | 1354 mAh/g<br>(0.1 A/g)   | 73%                          | 1380 mAh/g<br>(0.5 A/g, 240th)     | 977 mAh/g<br>(2 A/g, 5th)         | 26        |
| Co <sub>3</sub> O <sub>4</sub> microframes              | 1446 mAh/g<br>(0.1 A/g)   | 72%                          | 1296 mAh/g<br>(0.5 A/g, 200th)     | 757 mAh/g<br>(5 A/g, 4000th)      | 27        |
| CNT/Co <sub>3</sub> O <sub>4</sub> microtubes           | 1840 mAh/g<br>(0.1 A/g)   | 70%                          | 782 mAh/g<br>(1 A/g, 200th)        | 577 mAh/g<br>(4 A/g, 200th)       | 29        |
| Layer-by-layer Co <sub>3</sub> O <sub>4</sub> /graphene | ~                         | ~                            | 851 mAh/g<br>(2 A/g, 2000th)       | 509.3 mA/g<br>(5 A/g, 10th)       | 30        |
| Fusiform Co <sub>3</sub> O <sub>4</sub>                 | 1347 mAh/g<br>(0.1 A/g)   | 73%                          | ~1000 mAh/g<br>(0.1 A/g, 70th)     | 844 mAh/g<br>(2 A/g, 70th)        | 46        |
| C-doped Co <sub>3</sub> O <sub>4</sub> hollow nanofiber | 1385 mAh/g<br>(0.2 A/g)   | 70%                          | 1121 mAh/g<br>(0.2 A/g, 100th)     | ~780 mAh/g<br>(2 A/g, 10th)       | 57        |
| Porous Co <sub>3</sub> O <sub>4</sub> parallelepipeds   | 1608 mAh/g<br>(0.1 A/g)   | 67%                          | 1100 mAh/g<br>(0.1 A/g, 50th)      | 738 mAh/g<br>(1 A/g, 10th)        | 59        |
| Bowknot-like Co <sub>3</sub> O <sub>4</sub>             | 1841 mAh/g<br>(0.178 A/g) | 78%                          | 1388.8 mAh/g<br>(0.178 A/g, 100th) | 751.3 mAh/g<br>(1.78 A/g, 150th ) | This work |
